# Supplementary material for: Induction chemotherapy followed by radiotherapy versus concurrent chemoradiotherapy in the treatment of different risk locoregionally advanced nasopharyngeal carcinoma
Source: PubMed Central journal article supplement — Ther Adv Med Oncol. 2020 Jun 2;12:1758835920928214. doi: 10.1177/1758835920928214 (PMC7268167; doi:10.1177/1758835920928214), 2020-06-02
Supplement: Appendix_table_1.pdf [file Appendix_table_1.pdf]

**Appendix table 1. Comparison of cumulative survival rates of patients in different risk groups.**

| Treatment groups        | No. | %    | 5-year OS (95%CI)   | <i>P</i> value | 5-year PFS (95%CI)  | <i>P</i> value | 5-year DMFS (95%CI) | <i>P</i> value |
|-------------------------|-----|------|---------------------|----------------|---------------------|----------------|---------------------|----------------|
|                         |     |      |                     | <0.001         |                     | <0.001         |                     | <0.001         |
| Low-risk group          | 603 | 33.2 | 95.9% (94.3%-97.5%) |                | 95.9% (94.3%-97.5%) |                | 95.4% (93.6%-97.2%) |                |
| Intermediate-risk group | 559 | 30.8 | 89.2% (86.7%-91.7%) |                | 88.7% (86.0%-91.4%) |                | 88.8% (86.1%-91.5%) |                |
| High-risk group         | 652 | 36.0 | 75.8% (72.5%-79.1%) |                | 73.3% (69.8%-76.8%) |                | 76.4% (73.1%-79.7%) |                |

Abbreviations: **OS** =overall survival; **PFS** =progression-free survival; **DMFS** =distant metastasis-free survival
