# Supplementary material for: Induction chemotherapy followed by radiotherapy versus concurrent chemoradiotherapy in the treatment of different risk locoregionally advanced nasopharyngeal carcinoma
Source: PubMed Central journal article supplement — Ther Adv Med Oncol. 2020 Jun 2;12:1758835920928214. doi: 10.1177/1758835920928214 (PMC7268167; doi:10.1177/1758835920928214), 2020-06-02
Supplement: Appendix_table_2.pdf [file Appendix_table_2.pdf]

**Appendix table 2. Multivariate analyses of the potential prognostic factors on clinical outcome: Hazard Ratios (HR), 95% Confidence Intervals (CI), and *p* Values.**

| Endpoint                  | HR(95%CI)       | <i>p</i> value | Endpoint   | HR(95%CI)        | <i>p</i> value | Endpoint    | HR(95%CI)        | <i>p</i> value |
|---------------------------|-----------------|----------------|------------|------------------|----------------|-------------|------------------|----------------|
| <b>OS</b>                 |                 |                | <b>PFS</b> |                  |                | <b>DMFS</b> |                  |                |
| <b>Age,y</b>              |                 |                |            |                  |                |             |                  |                |
| 18-29                     | Reference       |                |            | Reference        |                |             | Reference        |                |
| 30-39                     | 1.35(0.68-2.69) | 0.393          |            | 1.27 (0.71-2.28) | 0.427          |             | 1.17 (0.60-2.28) | 0.643          |
| 40-49                     | 1.83(0.94-3.54) | 0.074          |            | 1.64 (0.94-2.88) | 0.084          |             | 1.39 (0.73-2.64) | 0.311          |
| 50-59                     | 2.02(1.03-3.95) | 0.040          |            | 1.75 (0.99-3.11) | 0.054          |             | 1.58 (0.83-3.03) | 0.164          |
| >60                       | 3.44(1.74-6.80) | <0.001         |            | 2.64 (1.46-4.77) | 0.001          |             | 1.92 (0.98-3.79) | 0.059          |
| <b>Gender</b>             |                 |                |            |                  |                |             |                  |                |
| Female                    | Reference       |                |            | Reference        |                |             | Reference        |                |
| Male                      | 1.61(1.16-2.24) | 0.004          |            | 1.45 (1.08-1.93) | 0.012          |             | 1.61 (1.14-2.27) | 0.007          |
| <b>Histology,WHO type</b> |                 |                |            |                  |                |             |                  |                |
| I                         | Reference       |                |            | Reference        |                |             | Reference        |                |
| II                        | 0.93(0.12-7.07) | 0.943          |            | 0.46 (0.11-2.03) | 0.307          |             | 0.77 (0.10-6.00) | 0.802          |
| III                       | 0.64(0.09-4.64) | 0.661          |            | 0.38 (0.09-1.54) | 0.175          |             | 0.70 (0.10-5.08) | 0.727          |
| <b>T stage</b>            |                 |                |            |                  |                |             |                  |                |
| T1                        | Reference       |                |            | Reference        |                |             | Reference        |                |
| T2                        | 1.36(0.68-2.71) | 0.389          |            | 1.57 (0.84-2.94) | 0.157          |             | 1.02 (0.52-2.00) | 0.956          |
| T3                        | 1.40(0.73-2.68) | 0.306          |            | 1.53 (0.85-2.77) | 0.158          |             | 1.13 (0.61-2.10) | 0.702          |
| T4                        | 2.58(1.32-5.04) | 0.006          |            | 2.53 (1.36-4.68) | 0.003          |             | 1.58 (0.82-3.04) | 0.169          |

**N stage**

|    |                 |        |                  |        |                  |       |
|----|-----------------|--------|------------------|--------|------------------|-------|
| N0 | Reference       |        | Reference        |        | Reference        |       |
| N1 | 1.46(0.93-2.31) | 0.103  | 1.50 (0.99-2.27) | 0.056  | 1.17 (0.72-1.91) | 0.525 |
| N2 | 2.05(1.29-3.24) | 0.002  | 1.93 (1.27-2.94) | 0.002  | 1.65 (1.01-2.71) | 0.046 |
| N3 | 2.62(1.52-4.50) | <0.001 | 3.08 (1.90-5.01) | <0.001 | 2.11 (1.20-3.71) | 0.009 |

**Smoking**

|     |                 |       |                  |       |                  |       |
|-----|-----------------|-------|------------------|-------|------------------|-------|
| No  | Reference       |       | Reference        |       | Reference        |       |
| Yes | 0.99(0.76-1.29) | 0.924 | 1.00 (0.79-1.27) | 0.998 | 0.92 (0.69-1.22) | 0.548 |

**Family History**

|     |                  |       |                  |       |                  |       |
|-----|------------------|-------|------------------|-------|------------------|-------|
| No  | Reference        |       | Reference        |       | Reference        |       |
| Yes | 0.92 (0.62-1.36) | 0.671 | 0.88 (0.61-1.25) | 0.463 | 0.86 (0.57-1.30) | 0.475 |

**EBV DNA level**

|                    |                   |        |                  |        |                   |        |
|--------------------|-------------------|--------|------------------|--------|-------------------|--------|
| <1000 copies/ml    | Reference         |        | Reference        |        | Reference         |        |
| 1000-9999          | 1.36 (0.984-1.88) | 0.063  | 1.30 (0.97-1.76) | 0.084  | 1.55 (1.08-2.24)  | 0.019  |
| 10000-99999        | 1.67 (1.19-2.35)  | 0.003  | 1.96 (1.45-2.67) | <0.001 | 2.61 (1.81-3.76)  | <0.001 |
| 100000-999999      | 2.41 (1.61-3.63)  | <0.001 | 2.55 (1.77-3.67) | <0.001 | 3.15 (2.03-4.91)  | <0.001 |
| ≥1000000 copies/ml | 5.43 (3.05-9.66)  | <0.001 | 5.25 (3.09-8.92) | <0.001 | 9.21 (5.11-16.61) | <0.001 |

---

Abbreviations: **OS** =overall survival; **PFS** =progression-free survival; **DMFS** =distant metastasis-free survival
